# Supplementary material for: The Impact of Rural Hospital Closures and Health Service Restructuring on Provincial- and Community-Level Patterns of Hospital Admissions in New Brunswick
Source: MDPI journal article supplement (doi:10.3390/ijerph19127258), 2022-06-14
Supplement: s1 [file s1]

**Table S1:** coding for Ambulatory Care Sensitive Conditions inclusion and exclusion criteria.

| <b>Inclusion</b>                                                                                                                                                                                                                                                                                                                                                                                                                                                                                                                                                                              |                                                                                                                                                    |
|-----------------------------------------------------------------------------------------------------------------------------------------------------------------------------------------------------------------------------------------------------------------------------------------------------------------------------------------------------------------------------------------------------------------------------------------------------------------------------------------------------------------------------------------------------------------------------------------------|----------------------------------------------------------------------------------------------------------------------------------------------------|
| <b>Health Condition</b>                                                                                                                                                                                                                                                                                                                                                                                                                                                                                                                                                                       | <b>ICD 10 Codes</b>                                                                                                                                |
| Grand mal status and other epileptic convulsions                                                                                                                                                                                                                                                                                                                                                                                                                                                                                                                                              | G40, G41                                                                                                                                           |
| Chronic obstructive pulmonary disease (COPD)                                                                                                                                                                                                                                                                                                                                                                                                                                                                                                                                                  | J41, J42, J43, J44, or J47                                                                                                                         |
| Asthma                                                                                                                                                                                                                                                                                                                                                                                                                                                                                                                                                                                        | J45                                                                                                                                                |
| Congestive heart failure and pulmonary edema (CHF)                                                                                                                                                                                                                                                                                                                                                                                                                                                                                                                                            | I50, J81                                                                                                                                           |
| Hypertension                                                                                                                                                                                                                                                                                                                                                                                                                                                                                                                                                                                  | I10.0, I10.1, I11                                                                                                                                  |
| Angina                                                                                                                                                                                                                                                                                                                                                                                                                                                                                                                                                                                        | I20, I23.82, I24.0, I24.8, I24.9                                                                                                                   |
| Diabetes                                                                                                                                                                                                                                                                                                                                                                                                                                                                                                                                                                                      | E10.0, E10.1, E10.63, E10.9, E11.0, E11.1, E11.63, E11.9, E13.0, E13.1, E13.63, E13.9, E14.0, E14.1, E14.63, E14.9, E10.64, E11.64, E13.64, E14.64 |
| <b>Exclusion</b>                                                                                                                                                                                                                                                                                                                                                                                                                                                                                                                                                                              |                                                                                                                                                    |
| Any hospitalization record with the following Canadian Classification of Health Interventions (CCI) codes:                                                                                                                                                                                                                                                                                                                                                                                                                                                                                    |                                                                                                                                                    |
| 1HA58, 1HA80, 1HA87, 1HB53, 1HB54, 1HB55, 1HB87, 1HD53, 1HD54, 1HD55, 1HH59, 1HH71, 1HJ76, 1HJ82, 1HM57, 1HM78, 1HM80, 1HN71, 1HN80, 1HN87, 1HP76, 1HP78, 1HP80, 1HP82, 1HP83, 1HP87, 1HR71, 1HR80, 1HR84, 1HR87, 1HS80, 1HS90, 1HT80, 1HT89, 1HT90, 1HU80, 1HU90, 1HV80, 1HV90, 1HW78, 1HW79, 1HX71, 1HX78, 1HX79, 1HX80, 1HX83, 1HX86, 1HX87, 1HY85, 1HZ53 rubric (except 1HZ53LAKP), 1HZ54, 1HZ55 rubric (except 1HZ55LAKP), 1.HZ.56, 1.HZ.57, 1HZ59, 1HZ80, 1HZ85, 1HZ87, 1IF83, 1IJ50, 1IJ54GQAZ, 1IJ55, 1IJ57, 1IJ76, 1IJ80, 1IK57, 1IK80, 1IK87, 1IN84, 1LA84, 1LC84, 1LD84, 1YY54LANJ |                                                                                                                                                    |
